# Supplementary material for: eThread: A Highly Optimized Machine Learning-Based Approach to Meta-Threading and the Modeling of Protein Tertiary Structures
Source: PubMed Central journal article supplement (PMC3503980; doi:10.1371/journal.pone.0050200), 2012-11-21
Supplement: pone.0050200.s001.pdf [file pone.0050200.s001.pdf]

# **eThread: A highly optimized machine learning-based approach to meta-threading and the modeling of protein tertiary structures**

## **Supporting Information**

Burial score considers a 3-state residue classification:  $S$  (surface),  $M$  (middle layer) and  $I$  (interior). A protein structure is placed in an ellipsoid, whose size is calculated from mass-weighted principal axes [1,2]. Each residue is assigned to a particular class based on the distances between its  $C\alpha$  atom, the ellipsoid center and the ellipsoid surface. If the distance to the surface is twice as long as to the center, a residues is considered buried ( $I$ ), if the distance is twice as short it is considered surface ( $S$ ). Remaining residues are assigned a mid-layer class  $M$ . First, we calculated the composition of the amino acid of type  $A$  within a state  $B$  in the non-redundant CATH database [3] as follows:

$$C_{A,B}^{bur} = N_{A,B}^{bur} / \sum_{i=1}^{20} N_{i,B}^{bur} \quad \text{Eq. 1}$$

where  $N_{i,B}^{bur}$  is the number of amino acids of type  $i$  within the state  $B$ .

The normalized burial composition for a given amino acid  $A$  is defined as its composition in the particular state  $B$  (calculated from the structure) divided by its frequency of occurrence,  $f_A$ , in the dataset:

$$S_{A,B}^{bur} = \frac{C_{A,B}^{bur}}{f_A} \quad \text{Eq. 2}$$

For a given protein of length  $n$ , the total burial score,  $Burial$ , is calculated as the burial score averaged over all residues:

$$Burial = \frac{1}{n} \sum_{i=1}^n S_{i,B}^{bur} \quad \text{Eq. 3}$$

Secondary structure score is calculated in a similar fashion using a 7-state classification by STRIDE [4]: *H* –  $\alpha$ -helix, *G* – 3-10 helix, *I* –  $\pi$ -helix, *E* – extended conformation, *B* – isolated bridge, *T* – turn and *C* – coil. Similarly to the burial score, we calculated the composition of the amino acid of type *A* within a secondary structure *D* in the non-redundant CATH database,  $C_{A,D}^{sec}$ . The total secondary structure score, *SecStr*, is calculated as the normalized secondary structure composition,  $S_{A,D}^{sec}$ , averaged over all residues:

$$SecStr = \frac{1}{n} \sum_{i=1}^n S_{i,D}^{sec} \quad \text{Eq. 4}$$

## References

1. Browner MF, Fauman EB, Fletterick RJ (1992) Tracking conformational states in allosteric transitions of phosphorylase. *Biochemistry* 31: 11297-11304.
2. Brylinski M, Skolnick J (2008) What is the relationship between the global structures of apo and holo proteins? *Proteins* 70: 363-377.
3. Orengo CA, Michie AD, Jones S, Jones DT, Swindells MB, et al. (1997) CATH--a hierarchic classification of protein domain structures. *Structure* 5: 1093-1108.
4. Frishman D, Argos P (1995) Knowledge-based protein secondary structure assignment. *Proteins* 23: 566-579.
